# Supplementary material for: Inhibition of miR-199b-5p reduces pathological alterations in osteoarthritis by potentially targeting Fzd6 and Gcnt2
Source: eLife journal article supplement (doi:10.7554/elife.92645), 2023-12-04

CD9

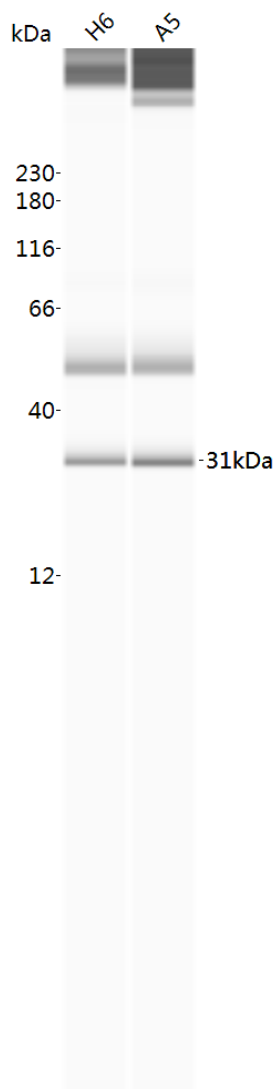

CD63

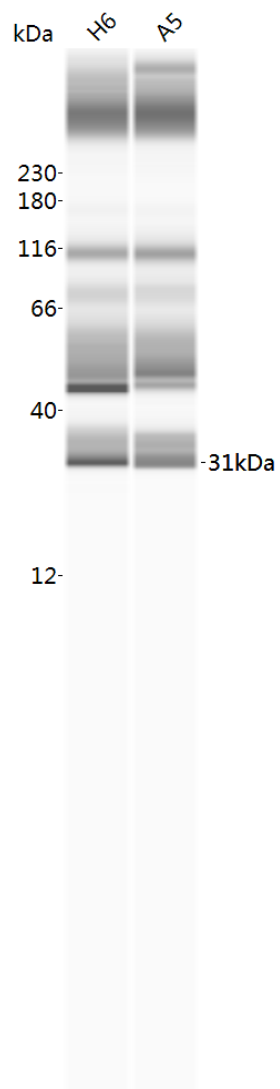

CD81

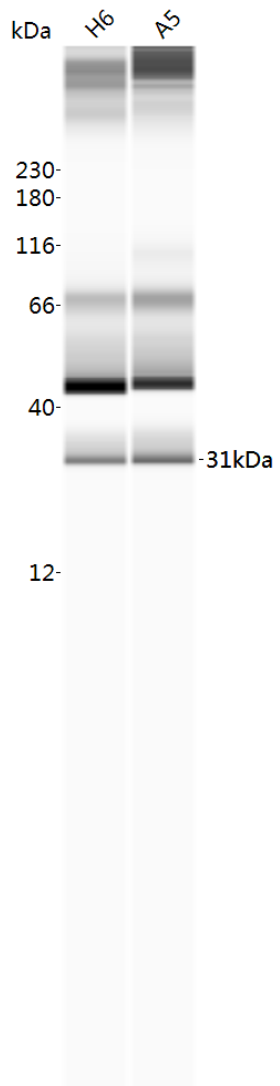

Supplement: fig1-figsupp1-data1 [file elife-92645-fig1-figsupp1-data1-v1.pdf]
