# Supplementary material for: Inhibition of miR-199b-5p reduces pathological alterations in osteoarthritis by potentially targeting Fzd6 and Gcnt2
Source: eLife. 2024 May 21;12:RP92645. doi: 10.7554/eLife.92645 (PMC11108644; doi:10.7554/eLife.92645)
Supplement: Figure 2—source data 1. [file elife-92645-fig2-data1.xlsx]

## Sheet: Fig.2C
hsa-miR-199b-5p		hsa-miR-3168		hsa-miR-15b-3p		hsa-miR-338-3p		hsa-miR-1296-5p
HC	OA	HC	OA	HC	OA	HC	OA	HC	OA
1	1.62	1	0.96	1	2.09	1	2.13	1	2.81
0.47	1.85	0.67	1.23	0.74	1.61	1.04	0.93	0.76	4.55
0.72	1.64	0.6	0.61	0.87	1.85	1.29	0.87	0.66	2.88
0.86	1.65	0.4	0.42	1.02	2	0.75	1.49	1.05	2.89
1.39	2.62	0.29	0.7	1.02	1.55	1.03	1.39	1.01	3.84

## Sheet: Fig.2D
mmu-miR-199b-5p				mmu-miR-15b-3p				mmu-miR-338-3p
normal	control	M-0.5	M-1	normal	control	M-0.5	M-1	normal	control	M-0.5	M-1
1	0.81	1.25	2.56	1	1	0.68	0.51	1	0.96	0.54	0.53
0.69	0.83	2.37	1.8	0.75	0.73	0.6	0.5	0.58	0.72	0.53	0.51
0.67	0.61	1.66	2.62	0.69	0.69	0.54	0.51	0.79	0.71	0.6	0.55
1.2	1.4	1.8	3.7	0.8	0.89	0.84	0.6	0.65	0.63	0.59	0.42
1.47	1.22	2.44	2.73	0.82	0.93	0.76	0.57	0.74	0.7	0.66	0.49
0.93	1.1	3.17	3.93	0.81	0.91	0.67	0.63	0.66	0.74	0.5	0.5
