# Supplementary material for: Inhibition of miR-199b-5p reduces pathological alterations in osteoarthritis by potentially targeting Fzd6 and Gcnt2
Source: eLife. 2024 May 21;12:RP92645. doi: 10.7554/eLife.92645 (PMC11108644; doi:10.7554/eLife.92645)
Supplement: Figure 3—source data 1. [file elife-92645-fig3-data1.xlsx]

## Sheet: Fig.3D
control	RNAnc	mimic	inhibitor
86.2408	98.3428	52.0885	91.687
83.7838	99.2937	53.8083	88.4271
80.344	97.5279	53.6855	73.5872
111.548	97.392	60.0737	83.5381
121.13	104.727	64.0049	84.2506
117.199	96.0337	67.6904	119.779

## Sheet: Fig.3E
control	RNAnc	mimic	inhibitor
1.25386	0.826449	1.2802	0.468581
0.850493	0.861545	1.47803	0.644553
0.990598	1.03886	1.3769	0.309148

## Sheet: Fig.3F
control	nc	mimic	inhibitor
1.23552	1.17843	1.27025	0.47143
0.781933	1.01879	1.72323	0.787372
0.9829	1.06206	1.92534	0.502383

## Sheet: Fig.3G
control	nc	mimic	inhibitor
1.19662	1.1534	0.428975	1.29143
0.663867	0.976639	0.539227	1.48031
1.42303	0.705099	0.663867	2.01247

## Sheet: Fig.3H
control	RNAnc	mimic	inhibitor
0.824974	0.491405	0.491405	2.62986
1.05335	1.77152	0.404717	2.13611
1.11143	0.719459	0.679441	1.77152

## Sheet: Fig.3I
control	RNAnc	mimic	inhibitor
0.764329	0.735623	0.297769	1.79286
0.464022	1.70177	0.464022	1.89509
1.83053	0.880893	0.68162	2.57089

## Sheet: Fig.3J
0	5	10	15
102.437	99.4777	82	67
107.138	101.045	92.688	72
105.571	94.0808	87	59.9509
90.0766	99.3036	90.4248	61.0565
94.7772	94.6031	90.9471	65

## Sheet: Fig.3K
Control	L	L+RNAnc	L+RNAmimic	L+RNAinhibitor
101.331	44.4717	58.1081	53.5626	124.447
102.146	45.946	45.2088	55.1597	103.931
103.369	44.4717	49.3858	55.774	136.364
96.0337	42.3833	31.6953	59.9509	119.533
95.8979	41.5233	33.7838	51.0565	117.813
117.199	42.7518	30.4668	58.9681	98.4787

## Sheet: Fig.3L
control	LPS	L+RNAnc	L+mimic	L+inhibitor
1.25386	106.623	138.052	151.836	55.9618
0.850493	150.787	101.573	119.128	74.3557
1.3769	116.677	121.128	116.677	72.3224

## Sheet: Fig.3M
control	LPS	L+RNAnc	L+mimic	L+inhibitor
1.23552	5.11636	4.63774	5.50278	1.784
0.781933	5.18778	3.69383	4.08467	1.09818
0.9829	4.57927	3.69383	5.57597	2.47104

[truncated: 3 more sheets: Fig.3N, Fig.3O, Fig.3P]
