# Supplementary material for: Inhibition of miR-199b-5p reduces pathological alterations in osteoarthritis by potentially targeting Fzd6 and Gcnt2
Source: eLife. 2024 May 21;12:RP92645. doi: 10.7554/eLife.92645 (PMC11108644; doi:10.7554/eLife.92645)
Supplement: Figure 4—source data 1. [file elife-92645-fig4-data1.xlsx]

## Sheet: Fig.4B
day	control				control+RNAnc				control+mimic				control+inhibitor
0	11.33	9.73	10.67	10.47	9.37	9.5	9.6	10.03	9.13	9.53	10.07	10.1	10.37	9.67	10.17	10
3	9.53333	10.3	9.76667	9.63333	8.7	9.43333	10.3333	10.2667	9.5	10.2	8.96667	9.5	10.6	9.5	9.6	9.63333
7	9.56667	9.13333	9.1	9.9	8.36667	9.5	10.3667	10.6667	10.6333	6.9	6.73	8.07	9.16667	9.4	11.1333	9.56667
10	9.6	9.93333	9.86667	8.8	10	9.26667	11	8.93333	5.3	7.6	4.06667	5.73333	8.76667	8.23333	9.86667	9.66667
14	9.86667	9.06667	8.4	9.23333	10.1667	11.0667	10.1	10.4	4.8	5.23333	5.13333	5.26667	7.43333	7.4	8.06667	7.93333
21	10.2667	10.0333	9.93333	10.1333	8.73333	10.5333	10.4667	10.9	4.83333	4.23333	3.93333	4.5	8.33333	7.96667	7.76667	7.86667
28	10.2	10	9.9	11.3333	9.3	11.4333	12.0667	10.4	5.16667	4.76667	4.2	5.87	10.4	10.8667	10.2333	9.3

## Sheet: Fig.4C
control	RNAnc	mimic	inhibitor
742.99	789.63	970.57	904.06
709.13	819.32	966.63	881.039
832.76	774.78	983.957	948.52
813.07	774.78	984.74	913.5
791.81	862.29	951.67	951.67
	798.22	961.91	915.86

## Sheet: Fig.4D
control	RNAnc	mimic	inhibitor
712.76	771.84	1012.94	882.315
704.78	768.647	1004.16	831.878
771.04	789.404	1012.94	829.585
796.59	751.881	1034.5	828.821
777.43	747.091	932.31	824.236
	841.297	1015.34	904.477

## Sheet: Fig.4F
control	RNAnc	inhibitor	mimic
0	0	0.5	1
0.5	0.5	0.5	1
0	0.5	0	0.5
