# Supplementary material for: Inhibition of miR-199b-5p reduces pathological alterations in osteoarthritis by potentially targeting Fzd6 and Gcnt2
Source: eLife. 2024 May 21;12:RP92645. doi: 10.7554/eLife.92645 (PMC11108644; doi:10.7554/eLife.92645)
Supplement: Figure 5—figure supplement 1—source data 1. [file elife-92645-fig5-figsupp1-data1.xlsx]

## Sheet: fig5-fig supplement 1A
day	control						M-0.1mg						M-0.5mg						M-0.75mg						M-1mg						M-1.5mg
0	6.66667	7.36667	7.23333	7.26667	8	7.56667	8.5	9.7	9.35	8.5	7.4	9.9	8.8	7.6	7.25	8	7.9	9.15	8.9	8.3	10.7667	8.13333	7.46667	7.43333	7.55	7.4	8.65	8.8	8.05	7.86667	7.15	7.25	6.5	7.9	6.35	7.3
3	7.26667	7.53333	6.7	6.36667	8.2	6.83333	3.55	3.7	5.25	3.55	3.1	3	3	2.8	3.45	3.25	3.85	4.05	3.6	3.26667	2.96667	4.1	3.16667	3.3	6.45	4.5	3.9	3.4	3.65	3.4	3.7	3.15	3.9	3.15	3.75	4.2
7	7.16667	5.46667	6.83333	7.26667	8	7.36667	2.85	3.6	4.8	2.95	3.9	4.2	2.8	4.2	3.25	3.9	3.4	3.95	3.53333	3.63333	3.23333	4.46667	3.86667	3.56667	5.1	5.9	4.85	3.25	3.4	3.7	3.45	3.4	3.55	3.3	3.75	3.2
10	8.13333	8.63333	8.36667	4.8	7.66667	7.46667	3.45	4.75	3	3	3.9	2.95	2.95	4.35	4.95	3.75	3.6	2.6	3.13333	3.86667	3.73333	3.73333	3.03333	3.5	5.5	6.35	5.3	3.5	3.85	3.7	3	3.2	3	3.45	3.05	2.95
14	7.76667	6.9	9	6.66667	7.6	7.66667	2.7	3.8	3.4	3.7	3.6	3.45	3.55	3.55	4.3	3.4	4.3	3.3	3.1	3.16667	3.26667	3.56667	3.83333	4.46667	4.95	4.3	4.45	4.25	3.9	3.6	4.8	4.05	5.4	3.75	3	3.9
21	10.4667	7.9	8.9	7.16667	9.5	7.36667	3.75	3.7	3.7	3.6	4.2	3.75	3.35	3.65	3.7	3.25	4.4	4.8	2.9	3.23333	3.6	4.5	3.8	4.36667	5.1	4.8	4.95	4.2	4.65	3.6	4.15	3.6	2.8	3.65	3.3	3.85
28	10.6333	9.93333	9.66667	9.13333	8.83333	10.4	4.2	3.95	3.55	3.45	4.7	4.7	4.55	4	4.2	3.5	4.65	3.35	4.13333	3.46667	3.86667	5	2.96667	3.26667	4.65	4.8	4.5	3.55	4.05	3.66667	3.1	3.25	2.25	3.7	3.5	2.25

## Sheet: fig5-fig supplement 1D
CTRL	M-0.1	M-0.5	M-0.75	M-1	M-1.5
1	1	4	3	5	5
1	1	3	3	4	3
0.5	0.5	3	2	4	4
0.5	2	3	5	3	2
0.5	1	3	2	5	4
0	1	5	3	2	6
