# Supplementary material for: Inhibition of miR-199b-5p reduces pathological alterations in osteoarthritis by potentially targeting Fzd6 and Gcnt2
Source: eLife. 2024 May 21;12:RP92645. doi: 10.7554/eLife.92645 (PMC11108644; doi:10.7554/eLife.92645)
Supplement: Figure 5—source data 1. [file elife-92645-fig5-data1.xlsx]

## Sheet: Fig.5B
day	control				model				M+RNAnc				M+mimic				M+inhibitor
0	11.33	9.73	10.67	10.47	9.9	8.8	9.9	9.27	9.4	9.03	9.37	10.2	9.1	9.27	10.7	10.3	10.0333	9.56667	8.63333	9.43333
3	9.53333	10.3	9.76667	9.63333	4.53333	3.4	4.36667	4.83333	5.96667	5.56667	5.06667	5.26667	5.2	3.67	4.73	4.1	4.5	5	5.8	4.43333
7	9.56667	9.13333	9.1	9.9	4.93333	3.3	4.56667	4.23333	4.5	4.7	3.43333	3.3	4.2	4.66667	5.5	3.93333	5.16667	3.93333	4.1	4.43333
10	9.6	9.93333	9.86667	8.8	3.2	4.13333	3.43333	3.63333	4.6	3.13333	3.96667	4.56667	3.53333	4.16667	3.93333	3.93333	6.7	5.9	6.6	7.46667
14	9.86667	9.06667	8.4	9.23333	5.33333	4.53333	4.23333	3.4	3.73333	4	4.36667	4.13333	4.1	3.06667	3.23333	4.43333	7.1	7.1	7.8	6.93333
21	10.2667	10.5333	9.93333	10.1333	3.3	4.03333	4.73333	3.4	4.23333	3.66667	3.83333	3.2	3.5	3.26667	3.7	3.53333	7.06667	7.16667	7.4	8.43333
28	10.2	10	9.9	11.3333	3.4	3.3	3.36667	3.5	3.83333	4.36667	3.73333	3.4	4.1	3.63333	4.4	4.1	8	7.76667	7.53333	8.27

## Sheet: Fig.5C
Control	Model	RNAnc+Model	mimic+Model	inhibitor+Model
742.99	1002.59	978.38	1021.33	817.54
709.13	995.56	965.89	979.16	791.77
832.76	1047.74	935.44	971.36	853.46
813.07	1016.24	947.15	1008.83	893.28
791.81	1020.97	973.7	986.97	802.7
		904.99	944.81	842.52

## Sheet: Fig.5D
Control	Model	RNAnc+Model	mimic+Model	inhibitor+Model
712.76	955.2	923.75	1058.2	886.006
704.78	932.39	916.67	980.36	894.65
771.04	937.11	928.46	986.65	899.37
796.59	949.69	963.85	966.99	881.29
777.43	978	893.989	1035.39	893.12
		911.17	998.44	900.16

## Sheet: Fig.5F
model	M+RNAnc	M+mimic	M+inhibitor
4	3	5	2
3	5	4	2
4	4	5	3
