# Supplementary material for: Inhibition of miR-199b-5p reduces pathological alterations in osteoarthritis by potentially targeting Fzd6 and Gcnt2
Source: eLife. 2024 May 21;12:RP92645. doi: 10.7554/eLife.92645 (PMC11108644; doi:10.7554/eLife.92645)
Supplement: Figure 6—source data 1. [file elife-92645-fig6-data1.xlsx]

## Sheet: Fig.6C
	control			mimic
Myh9	1.44998	0.807221	0.742795	0.67581	0.929604	0.749858
Atg14	1.13018	1.17817	0.690902	1.02566	1.3818	1.01858
Hif-1α	1.01494	0.889702	1.09535	0.753351	1.22382	0.883557
Fzd6	0.973327	0.953297	1.07251	0.395178	0.782781	0.334713
Gcnt2	1.02113	1.12909	0.849781	0.598278	0.542948	0.226705
Caprin1	0.862036	1.16136	0.976586	0.455594	0.821208	0.47166

## Sheet: Fig.6D
	control			inhibitor
Myh9	0.864283	0.870295	1.26538	0.919917	1.06406	0.876348
Atg14	0.853418	0.651268	1.49622	0.570905	0.493569	0.551458
Hif-1α	0.681389	1.33473	0.983878	1.36	1.43053	1.55461
Fzd6	1.08218	0.975319	0.942096	1.65169	1.74903	1.77024
Gcnt2	0.920519	0.864849	1.21463	2.86981	2.51569	1.73022
Caprin1	1.10537	0.734342	1.16032	0.855313	0.754987	1.00314

## Sheet: Fig.6G
NC mimics + m-Fzd6-3UTR-wt	mmu-miR-199b-5p + m-Fzd6-3UTR-wt	NC mimics + m-Fzd6-3UTR-mu	mmu-miR-199b-5p + m-Fzd6-3UTR-mu
1.00127	0.45609	0.972182	1.02669
0.982434	0.430727	1.00053	1.02979
1.01629	0.471442	1.02729	0.95137

## Sheet: Fig.6H
NC mimics + m-Gcnt2-3UTR-wt	mmu-miR-199b-5p + m-Gcnt2-3UTR-wt	NC mimics + m-Gcnt2-3UTR-mu	mmu-miR-199b-5p + m-Gcnt2-3UTR-mu
0.976102	0.45409	1.02101	0.997591
0.976479	0.463992	0.99603	1.02315
1.04742	0.477535	0.982964	0.999363

## Sheet: Fig.6I
GDS5401
control	oa
110.7	68
53.2	75.4
50.9	80.5
76.8	118.4
147.2	52.3
215.3	64.3
146.9	64.7
100.8	73
115.7	94.4
110.2	73.1

## Sheet: Fig.6J
GDS3578
control	OA
473.8	456
250.3	150.1
499	250.4
235.1	196.8
349.1	135.7
317	185.6

## Sheet: Fig.6K
control	OA
9	4.3
56.1	14.6
9.2	38.9
26.3	3.4
9.6	30.2
36.3	4.9
9	6.3
12.3	30.6
56.4	20.1
46.6	45.2

## Sheet: Fig.6L
control	OA
0.8	1.8
8.5	2.2
0.9	0.9
12	3.9
5.8	8.1
