# Supplementary material for: Inhibition of miR-199b-5p reduces pathological alterations in osteoarthritis by potentially targeting Fzd6 and Gcnt2
Source: eLife. 2024 May 21;12:RP92645. doi: 10.7554/eLife.92645 (PMC11108644; doi:10.7554/eLife.92645)
Supplement: Source data 1. [file elife-92645-data1.xlsx]

## Sheet: supplement file1-table s2
age		height		weight		BMI
control	KOA	c	k	c	k	c	k
65	48	1.63	1.69	65	72	24.4646	25.2092
52	55	1.56	1.58	50	55	20.5457	22.0317
61	49	1.67	1.62	78	62	27.968	23.6244
42	54	1.55	1.59	58	67	24.1415	26.5021
54	62	1.69	1.63	65	60	22.7583	22.5827
45	53	1.52	1.72	60	72	25.9695	24.3375
54	66	1.58	1.65	48	65	19.2277	23.8751
41	59	1.62	1.55	60	55	22.8624	22.8928
52	59	1.56	1.61	64	65	26.2985	25.0762
49	54	1.62	1.72	65	75	24.7676	25.3515
	36		1.67		67		24.0238
	48		1.56		70		28.764
	48		1.56		45.5		18.6966
	46		1.76		85		27.4406
	53		1.59		60		23.7332
